# Supplementary material
Source: PubMed Central journal article supplement (PMC6019628)
Supplement: NIHMS970830-supplement-suppl_info.pdf [file NIHMS970830-supplement-suppl_info.pdf]

## Supporting Information for:

### Catalytic bases and stereo-control in Lamiaceae class II diterpene cyclases

Samuel Schulte,<sup>†</sup> Kevin C. Potter,<sup>†</sup> Cody Lemke, and Reuben J. Peters\*

Roy J. Carver Department of Biochemistry, Biophysics & Molecular Biology, Iowa State University, Ames, IA 50011, USA

**Figure S1.** Identity (lower) and distance (upper) matrix for DTC alignment shown in Figure 1.

|        | 1  | 2     | 3     | 4     | 5     | 6     | 7     | 8     | 9     | 10    |
|--------|----|-------|-------|-------|-------|-------|-------|-------|-------|-------|
| SmCPS  | 1  | 0.19  | 0.40  | 0.44  | 0.46  | 0.47  | 0.51  | 0.50  | 0.60  | 0.86  |
| CfCPS  | 2  | 78.93 | 0.37  | 0.45  | 0.46  | 0.46  | 0.52  | 0.49  | 0.59  | 0.84  |
| MvCPS3 | 3  | 64.56 | 65.92 | 0.52  | 0.52  | 0.52  | 0.56  | 0.55  | 0.63  | 0.85  |
| RoCPS  | 4  | 60.85 | 60.66 | 56.43 | 0.11  | 0.14  | 0.22  | 0.35  | 0.61  | 0.91  |
| SfCPS  | 5  | 59.63 | 59.44 | 55.94 | 89.24 | 0.15  | 0.24  | 0.36  | 0.60  | 0.90  |
| SmCPS2 | 6  | 59.20 | 59.85 | 55.99 | 86.62 | 85.48 | 0.26  | 0.36  | 0.62  | 0.91  |
| SsCLS  | 7  | 56.11 | 55.77 | 53.82 | 77.20 | 75.71 | 73.89 | 0.42  | 0.62  | 0.91  |
| CfCLS  | 8  | 56.65 | 58.16 | 54.28 | 68.00 | 67.62 | 67.04 | 62.62 | 0.65  | 0.90  |
| MvPPS  | 9  | 52.29 | 52.54 | 49.57 | 50.85 | 51.10 | 50.06 | 49.63 | 49.32 | 0.88  |
| AtCPS  | 10 | 39.90 | 40.22 | 39.86 | 38.39 | 38.67 | 38.27 | 37.62 | 37.55 | 38.36 |

**Figure S2.** Mass spectra for enzymatic products and authentic standards (as indicated).

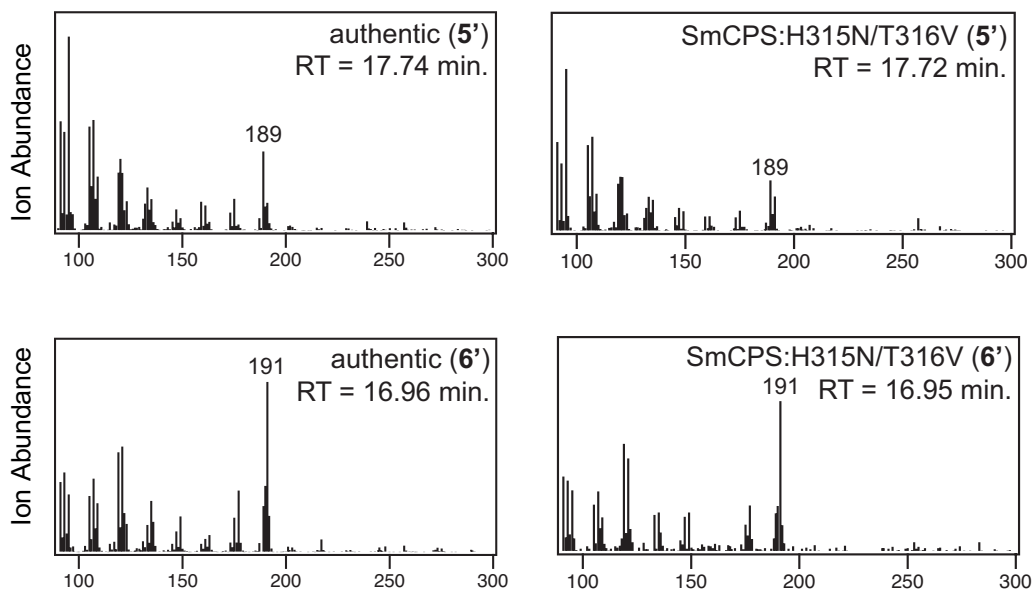

**Figure S3.** GC-MS chromatograms for indicated AtCPS mutants (**1'**, geranylgeraniol; **2'**, *ent*-copalol; **2\***, acetylated *ent*-copalol; **3'**, *ent*-8 $\alpha$ -hydroxy-copalol; **7'**, *ent*-kolavenol; +, contaminants).

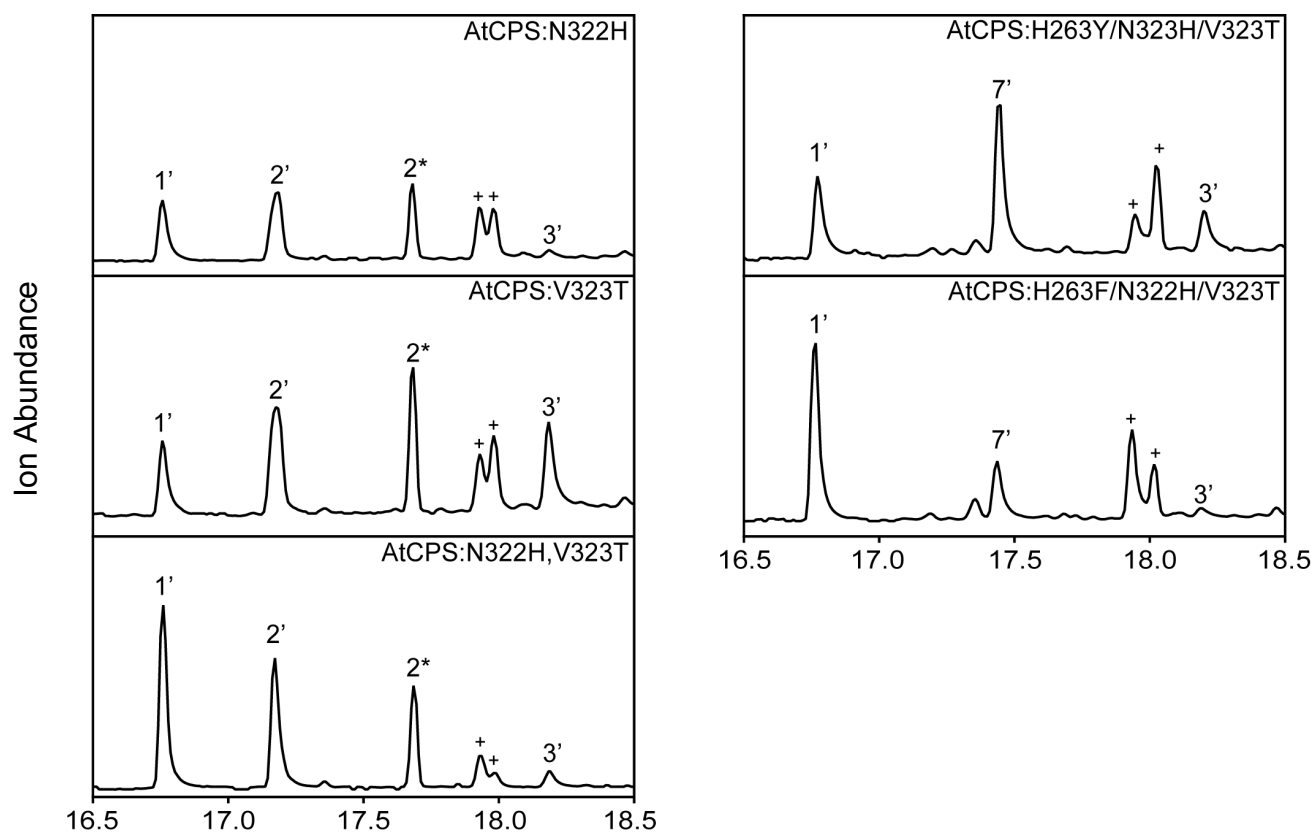

**Figure S4.** SmCPS active site. A) Modeled structure, with the side chains of the full set of residues targeted here, along with the aspartates from the DxDD motif that define the active site, shown and labeled. B) Conservation of the active site aromatic amino acids in the clade of Lamiaceae DTCs from more specialized metabolism.

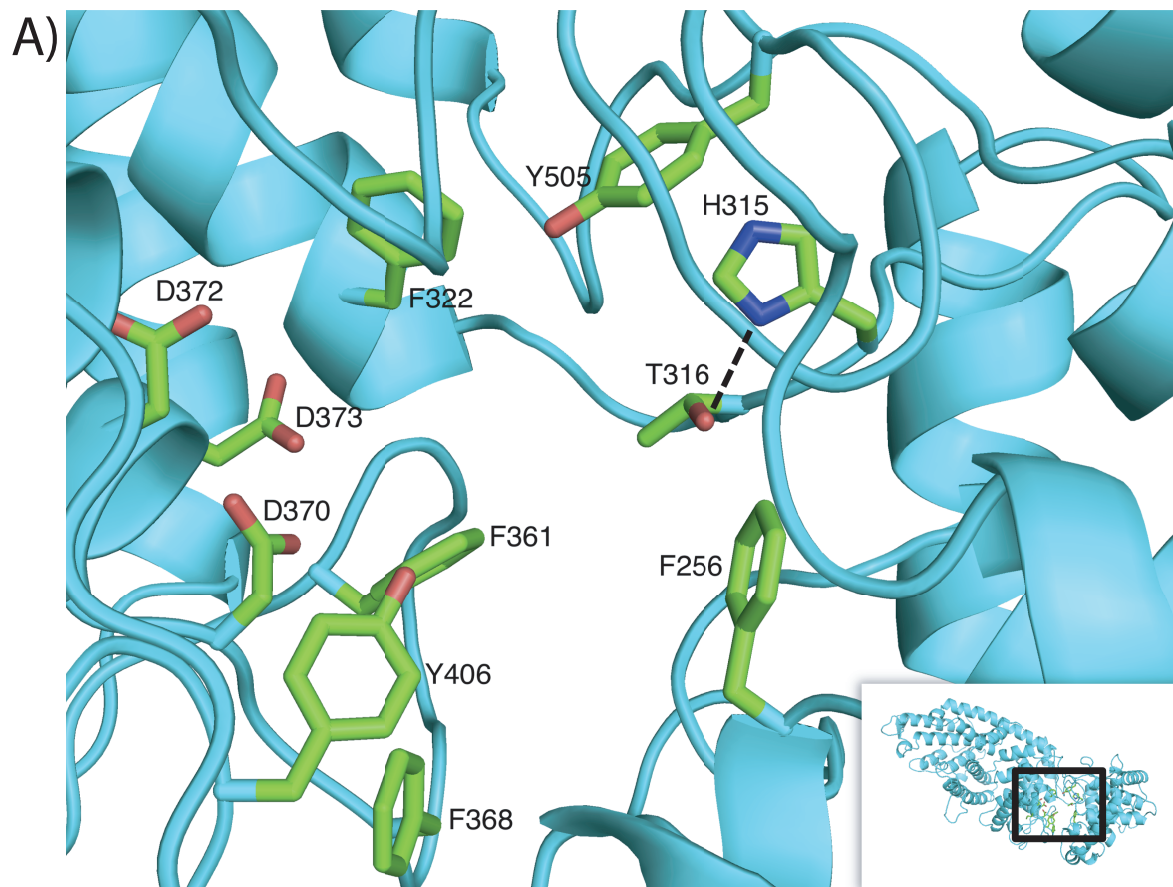

B)

|        | 322 |     | 361 |     | 368 |     | 406 |     | 505 |
|--------|-----|-----|-----|-----|-----|-----|-----|-----|-----|
| SmCPS  | VFG | ... | VFS | ... | EFC | ... | CYG | ... | LYR |
| CfCPS  | VFG | ... | VFS | ... | EFC | ... | CYG | ... | LYR |
| MvCPS3 | IFG | ... | VFS | ... | VFC | ... | CYG | ... | LYR |
| RoCPS  | VFA | ... | VFS | ... | EFC | ... | CYG | ... | FYR |
| SfCPS  | VFP | ... | VFS | ... | EFC | ... | CYG | ... | FYR |
| SmCPS2 | VFA | ... | VFS | ... | QFC | ... | CYG | ... | FYR |
| SsCLS  | IFS | ... | VFS | ... | KFS | ... | CYI | ... | FYR |
| CfCLS  | IFA | ... | VFS | ... | QFA | ... | CYA | ... | LYR |
| MvPPS  | LWS | ... | VYC | ... | KYA | ... | CLG | ... | FFR |

**Figure S5.** GC-MS chromatograms for indicated SmCPS mutants (**1'**, geranylgeraniol; **1\***, acetylated geranylgeraniol; **2'**, copalol; **3'**, 8 $\alpha$ -hydroxy-copalol; **5'**, terpentadienol; **6'**, *syn*-halima-5,13*E*-dienol; **6\***, acetylated *syn*-halima-5,13*E*-dienol; **8'**, *endo*-copalol).

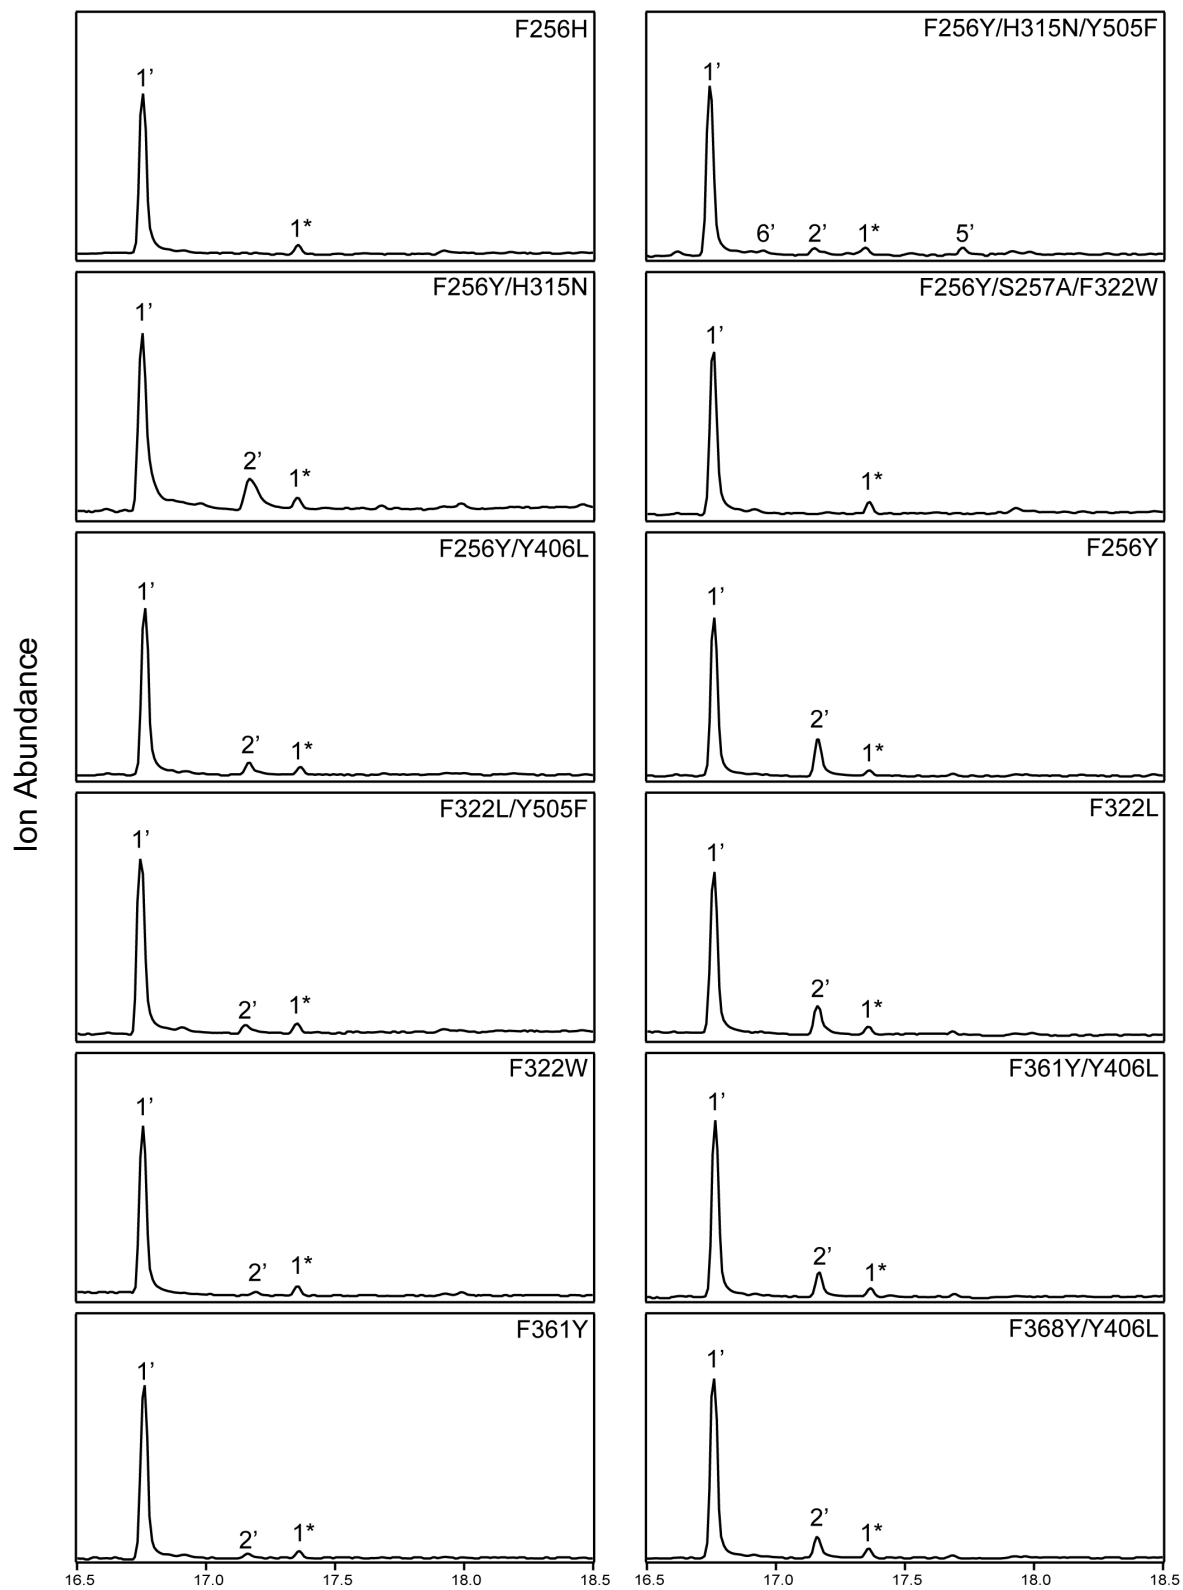

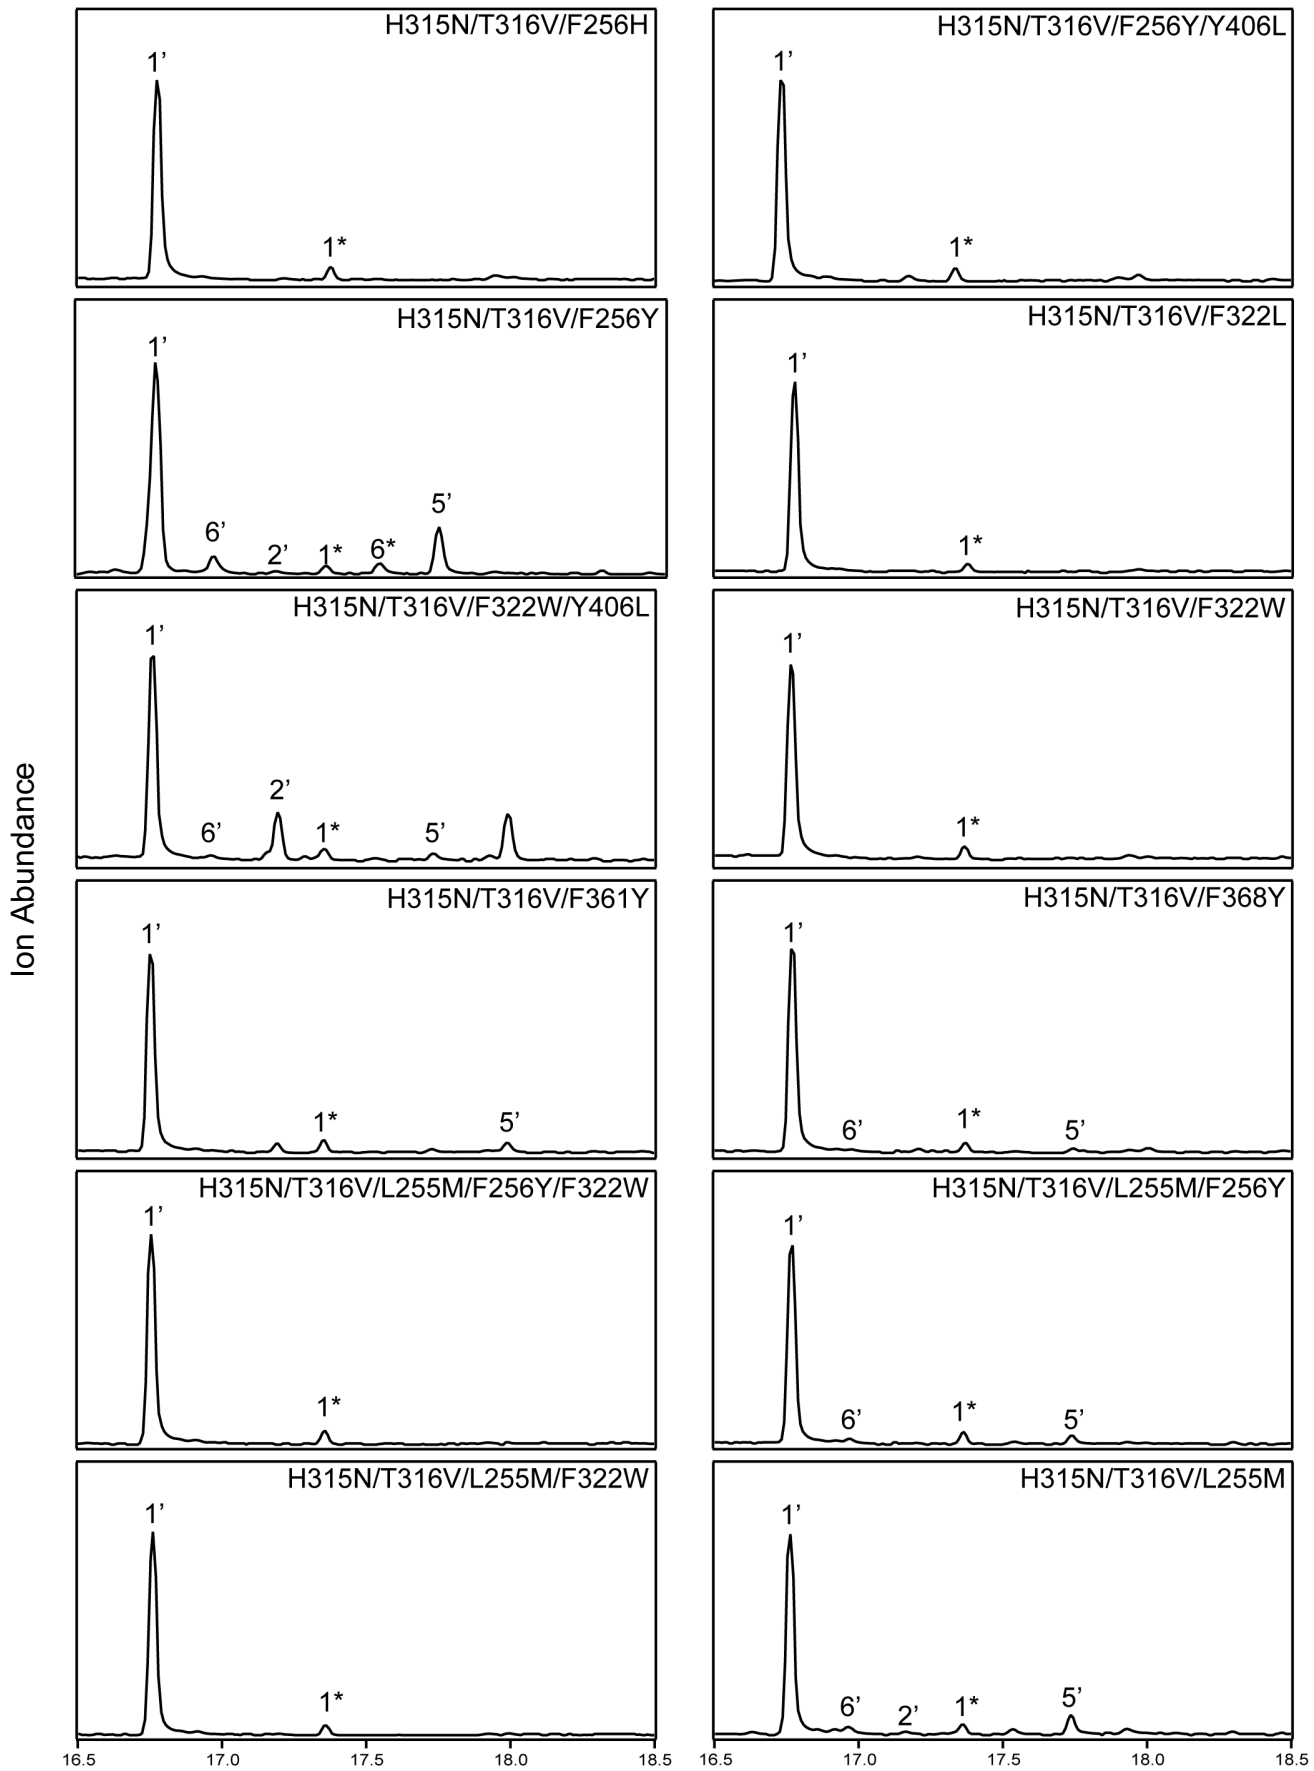

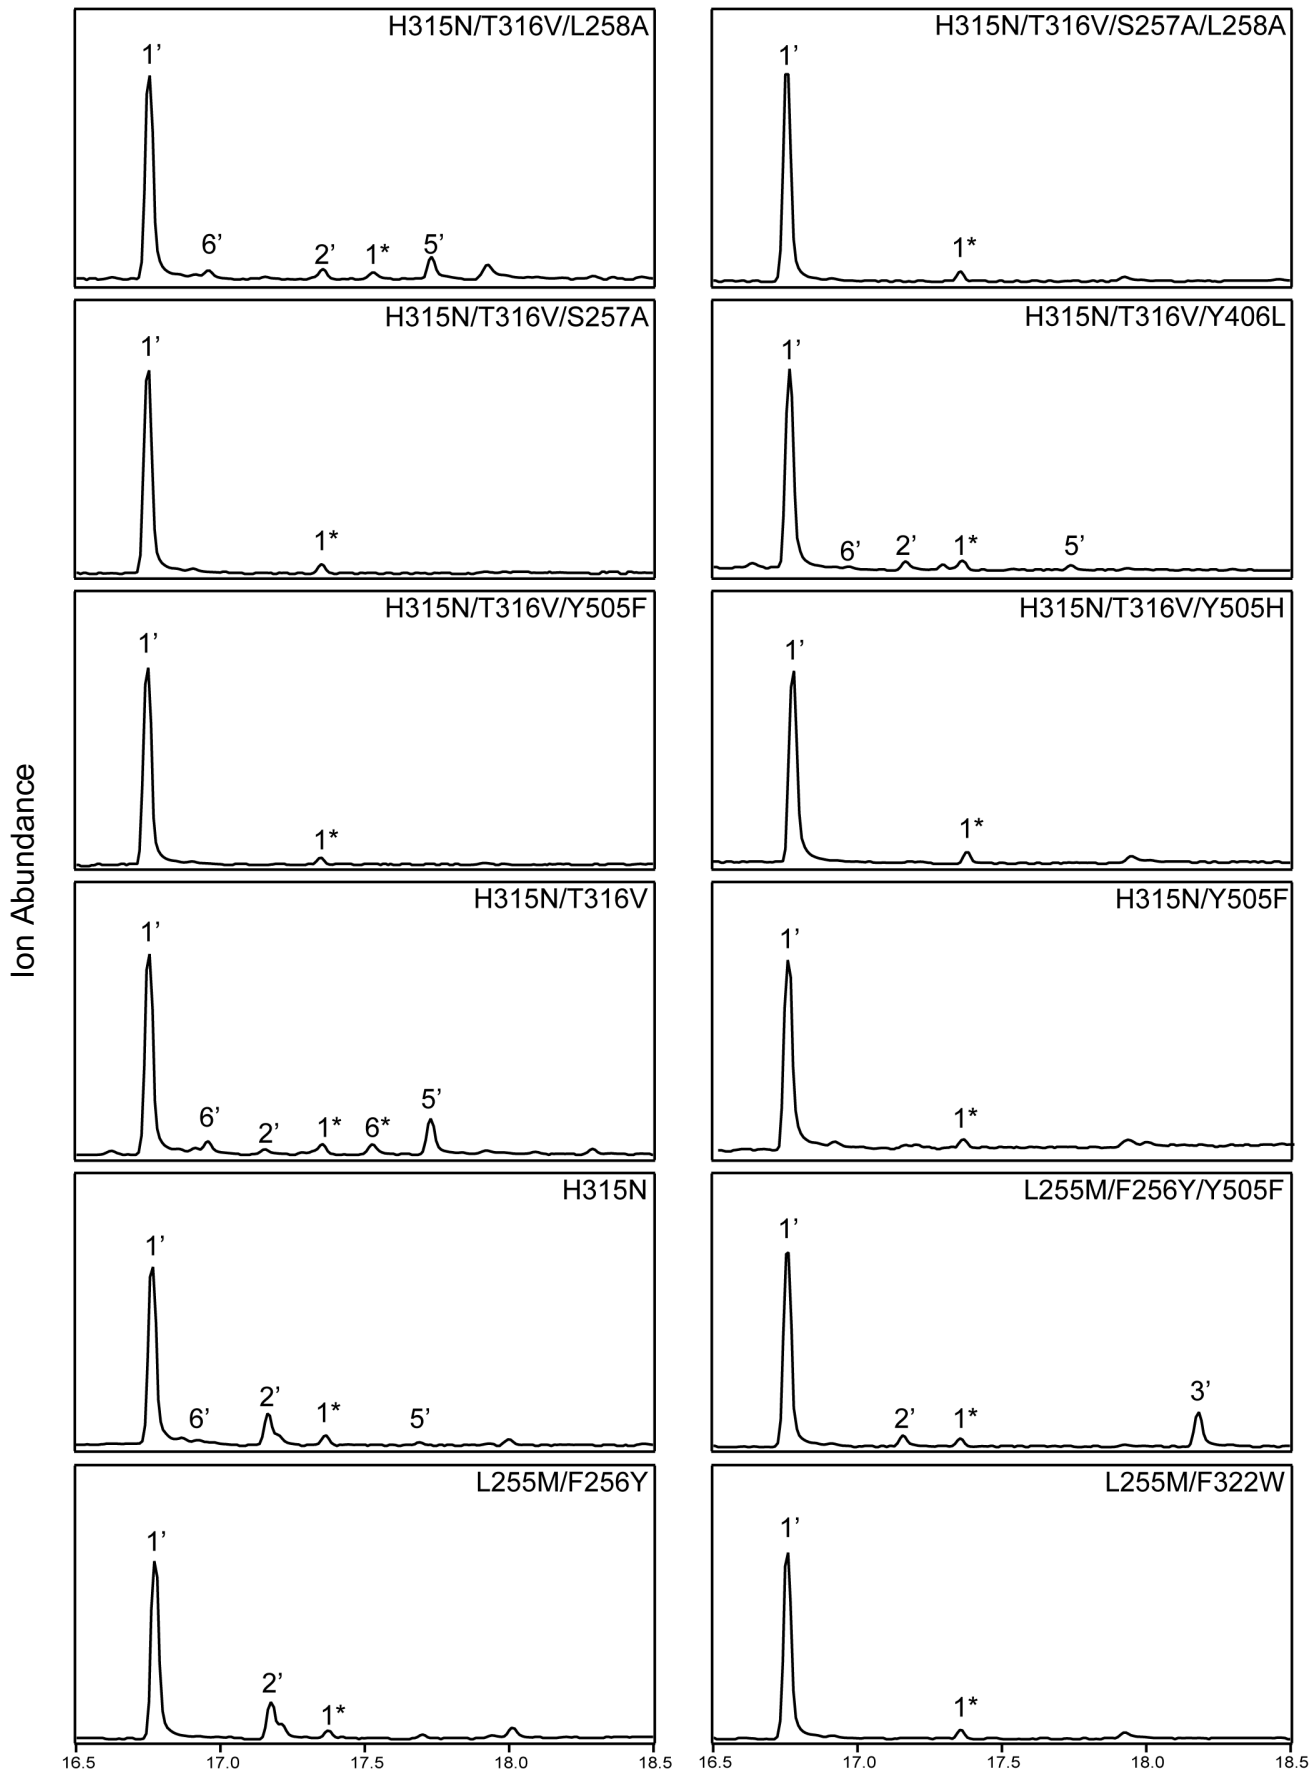

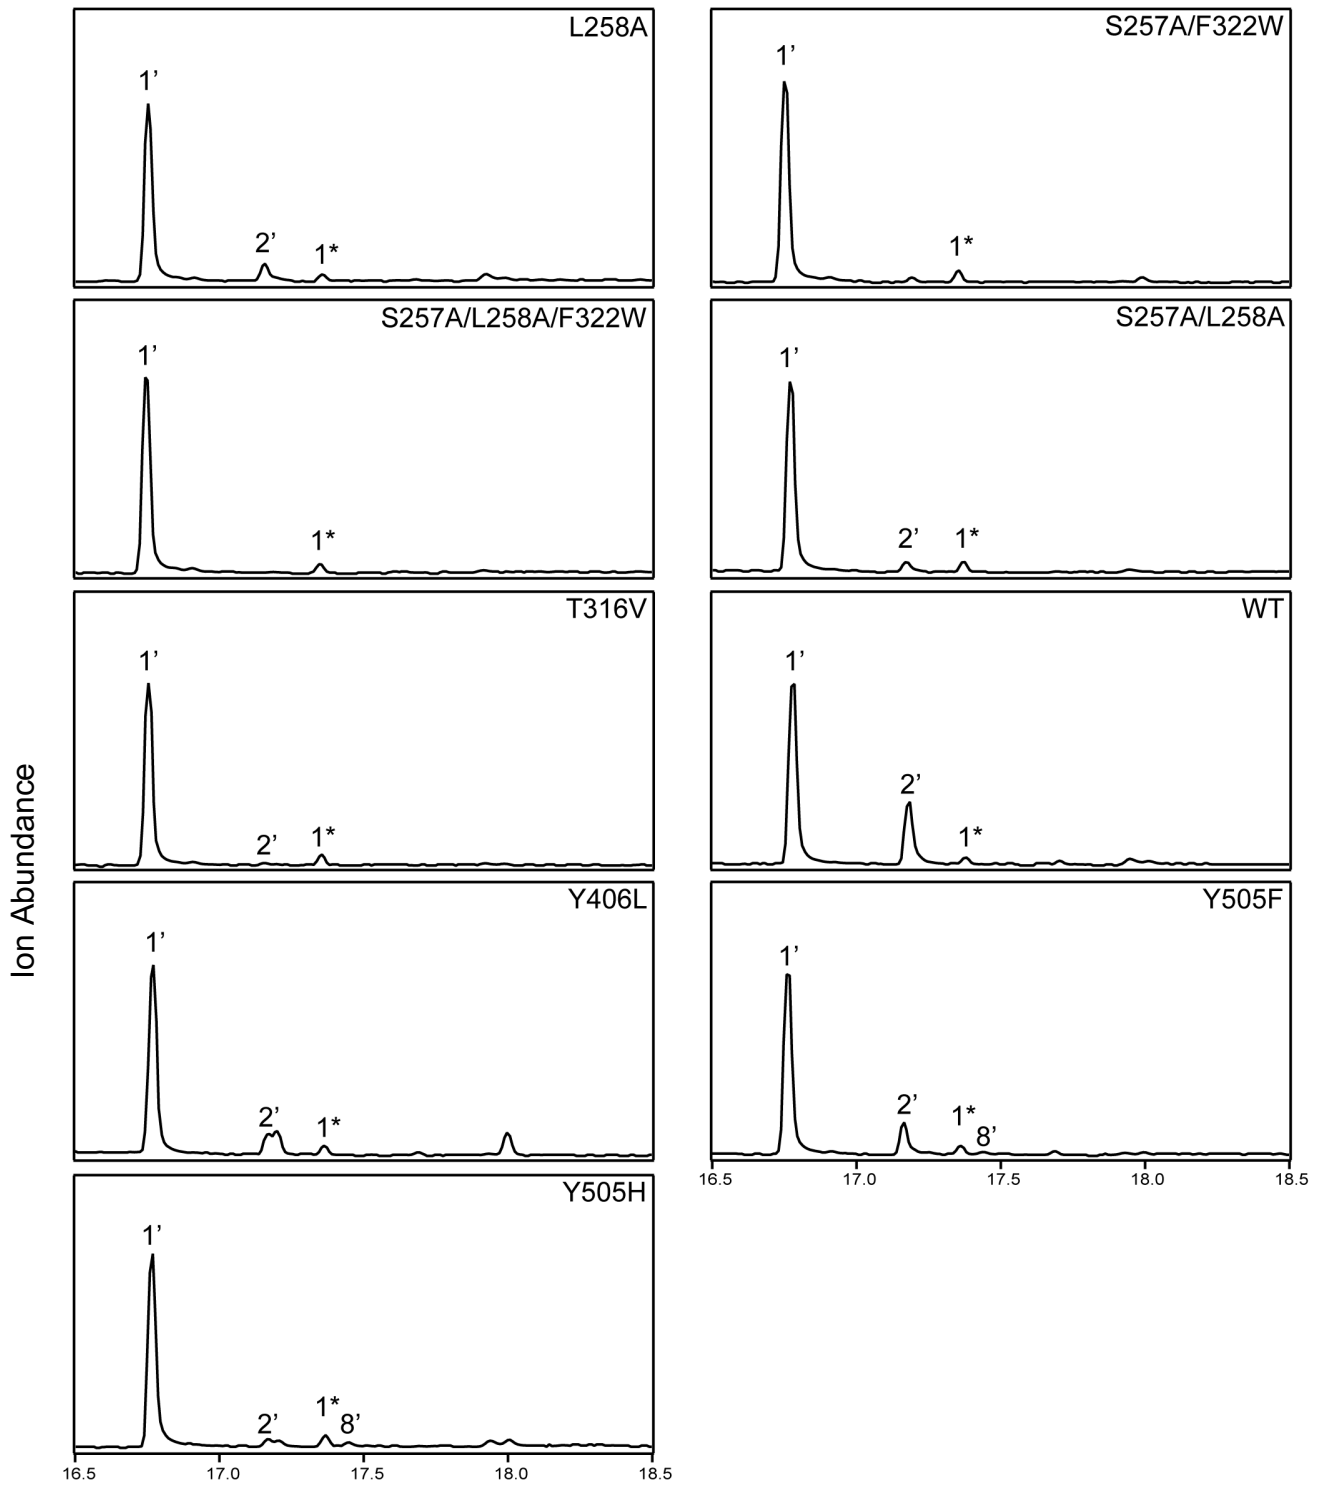

**Table S1.** Primers used here (bold/underlined highlights introduced changes).

| Gene                      | Mutant/use                                         | Primer                                             |
|---------------------------|----------------------------------------------------|----------------------------------------------------|
| SmCPS                     | sub-cloning F                                      | <b>CACC</b> ATGCATCAAGGCCATGATGCG                  |
|                           | sub-cloning R                                      | TCACGCGACTGGCTCGAAAAG                              |
|                           | L255M F                                            | CCGACATCATTAA <b>ATG</b> TTTAGTTTGAAGGGCTCG        |
|                           | L255M R                                            | CGAGCCCTTCCAAACTAA <b>ACAT</b> TAATGATGTCGG        |
|                           | F256H F                                            | CCGACATCATTATT <b>ACAT</b> AGTTTGAAGGGCTC          |
|                           | F256H R                                            | GAGCCCTTCCAAACTAT <b>GT</b> AATAATGATGTCGG         |
|                           | F256Y F                                            | CCGACATCATTATTAT <b>AT</b> AGTTTGAAGGGCTCG         |
|                           | F256Y R                                            | CGAGCCCTTCCAAACTATATAATAATGATGTCGG                 |
|                           | S257A F                                            | CCGACATCATTATTT <b>GCG</b> TTGGAAGGGCTCG           |
|                           | S257A R                                            | CGAGCCCTTCCAA <b>GCA</b> AAATAATAATGATGTCGG        |
|                           | S257G F                                            | CCGACATCATTATTT <b>GGC</b> TTGGAAGGGCTCG           |
|                           | S257G R                                            | CGAGCCCTTCCAA <b>GCA</b> AAATAATAATGATGTCGG        |
|                           | S257N F                                            | CCGACATCATTATTT <b>AACT</b> TTGGAAGGGCTCG          |
|                           | S257N R                                            | CGAGCCCTTCCAA <b>GT</b> TAAATAATAATGATGTCGG        |
|                           | L258A F                                            | CGACATCATTATTTAGT <b>GCG</b> GGAAGGGCTCG           |
|                           | L258A R                                            | CGAGCCCTTCC <b>GCA</b> CTAAATAATAATGATGTCG         |
|                           | H315N F                                            | GAGGAGCGCCA <b>ACACT</b> TATCCCGTC                 |
|                           | H315N R                                            | GACGGGATAAGTGT <b>TTGG</b> CGCTCCTC                |
|                           | T316V F                                            | GAGCGCCACAC <b>GTG</b> TATCCCGTCGAC                |
|                           | T316V R                                            | GTCGACGGGAT <b>ACAC</b> GTGTGGCGCTC                |
|                           | F322L F                                            | CGTCCGACGT <b>GCTG</b> GGGAAGGCTCTGG               |
|                           | F322L R                                            | CCAGAGCCTTCC <b>CAG</b> CACGTGACG                  |
|                           | F322W F                                            | CGTCCGACGT <b>GTTGG</b> GGAAGGCTCTGG               |
|                           | F322W R                                            | CCAGAGCCTTCC <b>CCAC</b> ACGTGACG                  |
|                           | F361Y F                                            | CGGATAAGGGAGTT <b>AT</b> AGTGGGAGAGAATCG           |
|                           | F361Y R                                            | CGATTCTCTCC <b>ACTA</b> TAACTCCCTTATCCG            |
|                           | F368Y F                                            | GGAGAGAATCGGAGT <b>ATT</b> GCGACATTGACG            |
|                           | F368Y R                                            | CGTCAATGTCGCA <b>ACT</b> CCGATTCTCTCC              |
|                           | Y406L F                                            | GTAATTCTCT <b>GCTG</b> GGCGGGCAGATGATC             |
|                           | Y406L R                                            | GATCATCTGCCCGCC <b>CAG</b> GCAAGAGAATTTAC          |
|                           | Y505F F                                            | GGAAAGACGCTG <b>TTTAG</b> GATGCCGGAG               |
|                           | Y505F R                                            | CTCCGGCATCCT <b>AAAC</b> AGCGTCTTTCC               |
|                           | Y505H F                                            | CGGAAAGACGCT <b>GCA</b> TAGGATGCCGGAG              |
|                           | Y505H R                                            | CTCCGGCATCCT <b>ATG</b> CAGCGTCTTTCCG              |
|                           | L255M/F256Y F                                      | CAAAATACCGACATCATTAA <b>ATGT</b> ATAGTTTGAAGGGCTC  |
|                           | L255M/F256Y R                                      | GAGCCCTTCCAAACTATA <b>ACAT</b> TAATGATGTCGGTATTTTG |
|                           | L255M+S257A F                                      | CGACATCATTAA <b>TTGCG</b> TTGGAAGGGCTCG            |
|                           | L255M+S257A R                                      | CGAGCCCTTCCAA <b>GCA</b> AAACATTAATGATGTCG         |
|                           | L255M+L258A F                                      | CGACATCATTAA <b>TTAGT</b> GCGGAAGGGCTCG            |
|                           | L255M+L258A R                                      | CGAGCCCTTCC <b>GCA</b> CTAAACATTAATGATGTCG         |
|                           | F256H/S257N F                                      | CAAAATACCGACATCATTATTA <b>CATA</b> ACTTGAAGGGCTC   |
|                           | F256H/S257N R                                      | GAGCCCTTCCAA <b>GTTATG</b> TAAATAATGATGTCGGTATTTTG |
|                           | F256Y/S257A F                                      | GACATCATTATTAT <b>ATGCG</b> TTGGAAGGGCTCGAAAATTTG  |
|                           | F256Y/S257A R                                      | CAAATTTTCGAGCCCTTCCAA <b>GCA</b> TATAATAATGATGTC   |
|                           | F256Y/S257G F                                      | GACATCATTATTAT <b>ATGGC</b> TTGGAAGGGCTCGAAAATTTG  |
|                           | F256Y/S257G R                                      | CAAATTTTCGAGCCCTTCCAA <b>GCCAT</b> AATAATAATGATGTC |
| F256Y+L258A F             | CGACATCATTATTATAGT <b>GCG</b> GGAAGGGCTCG          |                                                    |
| F256Y+L258A R             | CGAGCCCTTCC <b>GCA</b> CTATATAATAATGATGTCG         |                                                    |
| S257A/L258A F             | GACATCATTATTT <b>GCGGC</b> GGAAGGGCTCGAAAATTTG     |                                                    |
| S257A/L258A R             | CAAATTTTCGAGCCCTTCC <b>GCCGC</b> AAAATAATAATGATGTC |                                                    |
| H315N/T316V F             | GAGGAGCGCCA <b>ACGTG</b> TATCCCGTCG                |                                                    |
| H315N/T316V R             | CGACGGGATA <b>CACGT</b> TTGGCGCTCCTC               |                                                    |
| L255M/F256Y+S257A/L258A F | GACATCATTAA <b>TTGCGGC</b> GGAAGGGCTCGAAAATTTG     |                                                    |
| L255M/F256Y+S257A/L258A R | CAAATTTTCGAGCCCTTCC <b>GCCGC</b> ATACATTAATGATGTC  |                                                    |
| AtCPS                     | H263Y F                                            | CCGACATCATTAA <b>ATG</b> TTTAGTTTGAAGGGCTCG        |
|                           | H263Y R                                            | CGAGCCCTTCCAAACTAA <b>ACAT</b> TAATGATGTCGG        |
|                           | H263F F                                            | CCGACATCATTATT <b>ACAT</b> AGTTTGAAGGGCTC          |
|                           | H263F R                                            | GAGCCCTTCCAAACTAT <b>GT</b> AATAATGATGTCGG         |
|                           | N322H F                                            | CCGACATCATTATTAT <b>AT</b> AGTTTGAAGGGCTCG         |
|                           | N322H R                                            | CGAGCCCTTCCAAACTATATAATAATGATGTCGG                 |
|                           | V323T F                                            | CCGACATCATTATTT <b>GCG</b> TTGGAAGGGCTCG           |
|                           | V323T R                                            | CGAGCCCTTCCAA <b>GCA</b> AAATAATAATGATGTCGG        |
|                           | N322H/V323T F                                      | CCGACATCATTATTT <b>GGC</b> TTGGAAGGGCTCG           |
|                           | N322H/V323T R                                      | CGAGCCCTTCCAA <b>GCA</b> AAATAATAATGATGTCGG        |
